# Supplementary material for: Tuning spin dynamics of binuclear Dy complexes using different nitroxide biradical derivatives
Source: Royal Society of Chemistry journal article supplement (doi:10.1039/d3dt04360f), 2024-01-01
Supplement: d3dt04360f1.pdf [file d3dt04360f1.pdf]

## Supporting Information

### Tuning spin dynamics of binuclear Dy complexes using the different nitroxide biradical derivatives

Hongwei Song<sup>[a]</sup>, Chaoyi Jin<sup>[a]</sup>, Xiaotong Wang<sup>[a]</sup>, Junfang Xie<sup>[a]</sup>, Yue Ma<sup>[a]</sup>, Jinkui Tang,<sup>\*</sup> <sup>[b]</sup> Licun Li<sup>\*[a]</sup>

[a] *Department of Chemistry, Key Laboratory of Advanced Energy Materials Chemistry, College of Chemistry, Nankai University, Tianjin 300071, China*

[b] *State Key Laboratory of Rare Earth Resource Utilization, Changchun Institute of Applied Chemistry, Chinese Academy of Sciences, Changchun 130022, China*

**Table S1.** Selected bond lengths [Å] and angles [°] for **1** and **2**.

| <b>1 GdZn</b> |          | <b>2 DyZn</b> |          |
|---------------|----------|---------------|----------|
| Gd(1)-O(7)    | 2.377(3) | Dy(1)-O(7)    | 2.352(4) |
| Gd(1)-O(7)#1  | 2.385(3) | Dy(1)-O(7)#1  | 2.360(4) |
| Gd(1)-O(6)    | 2.359(3) | Dy(1)-O(6)    | 2.325(4) |
| Gd(1)-O(5)    | 2.365(3) | Dy(1)-O(5)    | 2.333(4) |
| Gd(1)-O(4)    | 2.357(4) | Dy(1)-O(4)    | 2.334(5) |
| Gd(1)-O(3)    | 2.425(3) | Dy(1)-O(3)    | 2.380(4) |
| Gd(1)-O(2)    | 2.349(4) | Dy(1)-O(2)    | 2.323(4) |
| Gd(1)-O(1)    | 2.388(4) | Dy(1)-O(1)    | 2.360(5) |
| Zn(1)-O(9)    | 2.060(4) | Zn(1)-O(9)    | 2.054(4) |
| Zn(1)-O(10)   | 1.982(4) | Zn(1)-O(10)   | 1.981(5) |
| Zn(1)-O(11)   | 2.006(4) | Zn(1)-O(11)   | 2.003(5) |
| Zn(1)-O(12)   | 2.087(4) | Zn(1)-O(12)   | 2.088(5) |
| Zn(1)-N(5)    | 2.046(4) | Zn(1)-N(5)    | 2.036(6) |
| O(8)-N(2)     | 1.284(6) | O(8)-N(2)     | 1.277(8) |
| O(13)-N(4)    | 1.266(6) | O(13)-N(4)    | 1.258(8) |

|                    |          |                    |          |
|--------------------|----------|--------------------|----------|
| Gd(1)#1-O(7)-Gd(1) | 110.6(1) | Dy(1)-O(7)-Dy(1)#1 | 110.5(2) |
| O(7)#1-Gd(1)-O(7)  | 69.5(1)  | O(7)-Dy(1)-O(7)#1  | 69.5(2)  |
| O(2)-Gd(1)-O(1)    | 72.1(1)  | O(2)-Dy(1)-O(1)    | 72.8(2)  |
| O(4)-Gd(1)-O(3)    | 70.9(1)  | O(4)-Dy(1)-O(3)    | 71.5(2)  |
| O(6)-Gd(1)-O(5)    | 73.3(1)  | O(6)-Dy(1)-O(5)    | 73.6(2)  |
| C(34)-N(5)-Zn(1)   | 121.7(4) | C(34)-N(5)-Zn(1)   | 121.2(4) |
| O(10)-Zn(1)-O(9)   | 89.5(2)  | O(10)-Zn(1)-O(9)   | 89.6(2)  |
| O(11)-Zn(1)-O(12)  | 87.9(2)  | O(11)-Zn(1)-O(12)  | 87.6(2)  |

**Table S2.** Selected bond lengths [Å] and angles [°] for **3**.

| <b>3 DyZn</b>     |          |                    |          |
|-------------------|----------|--------------------|----------|
| Dy(1)-O(7)        | 2.349(4) | Dy(1)-O(4)         | 2.335(5) |
| Dy(1)-O(7)#1      | 2.373(4) | Dy(1)-O(3)         | 2.326(5) |
| Dy(1)-O(6)        | 2.353(5) | Dy(1)-O(2)         | 2.352(5) |
| Dy(1)-O(5)        | 2.323(5) | Dy(1)-O(1)         | 2.349(5) |
| Zn(1)-O(10)       | 1.966(6) | Zn(1)-O(13)        | 1.979(5) |
| Zn(1)-O(11)       | 2.057(6) | Zn(1)-O(14)        | 1.965(5) |
| Zn(1)-O(12)       | 2.076(5) | O(8)-N(2)          | 1.261(8) |
| N(3)-O(9)         | 1.271(9) | O(15)-N(4)         | 1.274(8) |
| O(14)-N(5)        | 1.300(7) | Dy(1)-O(7)-Dy(1)#1 | 111.5(2) |
| O(7)-Dy(1)-O(7)#1 | 68.5(2)  | O(1)-Dy(1)-O(2)    | 72.3 (2) |
| O(3)-Dy(1)-O(4)   | 72.4(2)  | O(5)-Dy(1)-O(6)    | 72.2(2)  |
| N(5)-O(14)-Zn(1)  | 116.7(4) | O(10)-Zn(1)-O(11)  | 90.8(3)  |

**Table S3.** SHAPE analysis for the Ln coordination spheres for **1-3**.

| Complex     | SAPR-8       | TDD-8 | BTPR-8 | JBTPR-8 |
|-------------|--------------|-------|--------|---------|
| <b>1 Gd</b> | <b>0.585</b> | 1.454 | 1.549  | 2.144   |
| <b>2 Dy</b> | <b>0.498</b> | 1.515 | 1.654  | 2.276   |
| <b>3 Dy</b> | <b>0.469</b> | 1.755 | 2.208  | 2.832   |

SAPR-8: Square antiprism; TDD-8: Triangular dodecahedron; BTPR-8: Biaugmented trigonal prism; JBTPR-8: Biaugmented trigonal prism.

**Table S4.** Best fitted parameters ( $\chi_T, \chi_S, \tau, \alpha$ ) with the Debye model for complex **2** from fitting of ac data at 0 Oe in the temperature range 2-11 K

| $T/K$ | $\chi_S / \text{cm}^3\text{mol}^{-1}$ | $\chi_T / \text{cm}^3\text{mol}^{-1}$ | $\tau/\text{s}$ | $\alpha$ |
|-------|---------------------------------------|---------------------------------------|-----------------|----------|
| 1.9   | 6.76(1)                               | 0.59(2)                               | 0.0038(3)       | 0.33(2)  |
| 2.2   | 7.17(5)                               | 0.93(6)                               | 0.00379(3)      | 0.33(3)  |
| 2.5   | 6.51(7)                               | 0.38(8)                               | 0.00328(1)      | 0.32(1)  |
| 3.0   | 6.22(4)                               | 0.36(6)                               | 0.00249(5)      | 0.31(1)  |
| 3.5   | 6.04(5)                               | 0.56(6)                               | 0.00221(6)      | 0.29(2)  |
| 4.0   | 6.15(2)                               | 1.11(5)                               | 0.0015(6)       | 0.24(2)  |
| 4.5   | 5.48(2)                               | 1.02(6)                               | 0.00125(7)      | 0.23(2)  |
| 5.0   | 4.89(1)                               | 0.64(4)                               | 8.35(1)E-4      | 0.20(1)  |
| 6.0   | 5.12(7)                               | 0.37(5)                               | 4.45(9)E-4      | 0.17(1)  |
| 7.0   | 4.88(8)                               | 1.62(7)                               | 2.56(6)E-4      | 0.15(1)  |
| 8.0   | 4.63(2)                               | 1.86(3)                               | 1.53(1)E-4      | 0.14(1)  |
| 9.0   | 4.41(6)                               | 2.25(1)                               | 9.57(3)E-5      | 0.12(2)  |
| 10.0  | 4.07(3)                               | 1.91(2)                               | 3.62(2)E-5      | 0.16(6)  |
| 11.0  | 3.67(1)                               | 2.99(4)                               | 8.64(7)E-5      | 0.026(3) |

**Table S5.** Best fitted parameters ( $\Delta\chi_1, \Delta\chi_2, \tau_1, \tau_2, \alpha_1, \alpha_2$ ) with the modified Debye model for complex **3** from fitting of ac data at 0 Oe in the temperature range 2-11 K

| $T/K$ | $\chi_{s,\text{tot}}/\text{cm}^3\text{mol}^{-1}$ | $\Delta\chi_1/\text{cm}^3\text{mol}^{-1}$ | $\Delta\chi_2/\text{cm}^3\text{mol}^{-1}$ | $\tau_1/\text{s}$ | $\alpha_1$ | $\tau_2/\text{s}$ | $\alpha_2$ |
|-------|--------------------------------------------------|-------------------------------------------|-------------------------------------------|-------------------|------------|-------------------|------------|
| 1.9   | 2.61(6)                                          | 3.91(6)                                   | 3.27(4)                                   | 0.05(2)           | 0.27(6)    | 1.77(1)E-4        | 0.67(1)    |
| 2.2   | 2.19(2)                                          | 3.83(1)                                   | 2.92(9)                                   | 0.042(3)          | 0.25(6)    | 1.50(5)E-4        | 0.65(5)    |
| 2.5   | 2.39(8)                                          | 3.62(2)                                   | 2.77(5)                                   | 0.035(8)          | 0.23(7)    | 1.31(1)E-4        | 0.62(2)    |
| 3     | 1.82(2)                                          | 4.06(1)                                   | 2.22(5)                                   | 0.024(5)          | 0.22(7)    | 9.78(3)E-5        | 0.60(8)    |
| 3.5   | 1.83(1)                                          | 3.14(3)                                   | 2.36(8)                                   | 0.018(1)          | 0.20(7)    | 7.80(2)E-5        | 0.55(1)    |
| 4     | 1.93(3)                                          | 2.18(1)                                   | 2.56(1)                                   | 0.011(1)          | 0.19(2)    | 5.79(2)E-5        | 0.52(6)    |
| 4.5   | 1.72(1)                                          | 2.09(3)                                   | 2.28(2)                                   | 0.0079(7)         | 0.21(8)    | 4.50(1)E-5        | 0.51(1)    |
| 5     | 1.71(1)                                          | 1.80(3)                                   | 2.09(5)                                   | 0.0050(5)         | 0.15(8)    | 3.25(1)E-5        | 0.38(2)    |
| 6     | 1.54(6)                                          | 1.50(5)                                   | 1.83(5)                                   | 0.0028(3)         | 0.12(5)    | 2.09(1)E-5        | 0.30(1)    |
| 7     | 1.37(8)                                          | 1.97(2)                                   | 0.96(1)                                   | 0.00138(2)        | 0.11(3)    | 1.59(1)E-5        | 0.076(1)   |
| 8     | 1.29(4)                                          | 0.87(4)                                   | 1.67(4)                                   | 9.77(1)E-4        | 0.13(6)    | 1.29(1)E-5        | 0.16(6)    |
| 9     | 1.23(6)                                          | 1.63(4)                                   | 0.63(8)                                   | 6.26(7)E-4        | 0.10(5)    | 1.10(7)E-5        | 0.31(1)    |
| 10    | 1.58(8)                                          | 1.18(2)                                   | 0.58(2)                                   | 3.72(3)E-4        | 0.13(4)    | 1.06(8)E-5        | 0.082(1)   |
| 11    | 0.82(3)                                          | 1.19(4)                                   | 0.15(8)                                   | 2.50(2)E-4        | 0.09(1)    | 1.50(3)E-5        | 0.079(2)   |

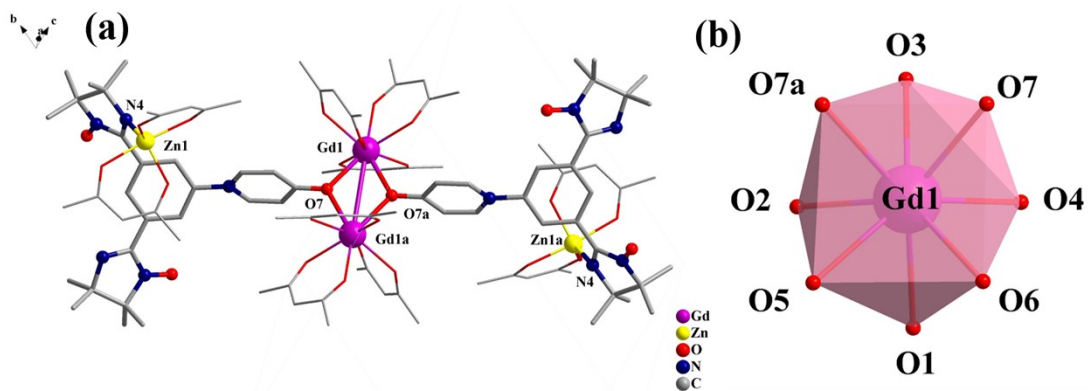

**Figure S1.** (a) The tetranuclear structure of **1** (H atoms and F atoms are not shown). (b) Coordination polyhedron around Gd<sup>III</sup> in **1**.

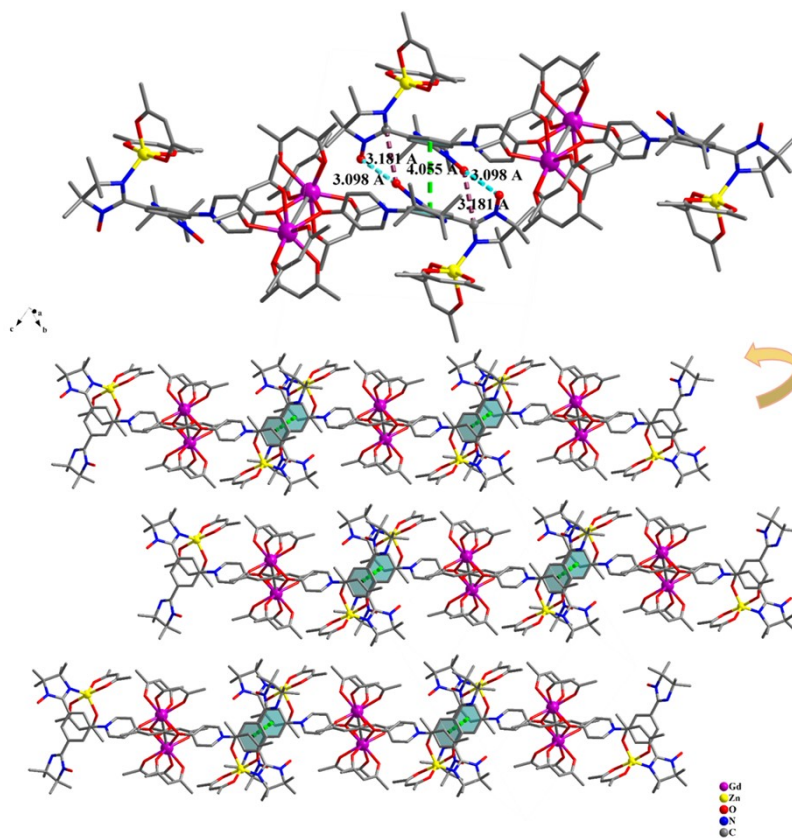

**Fig.S2.** Packing diagram of complex **1**. H and F atoms are not shown for clarity.

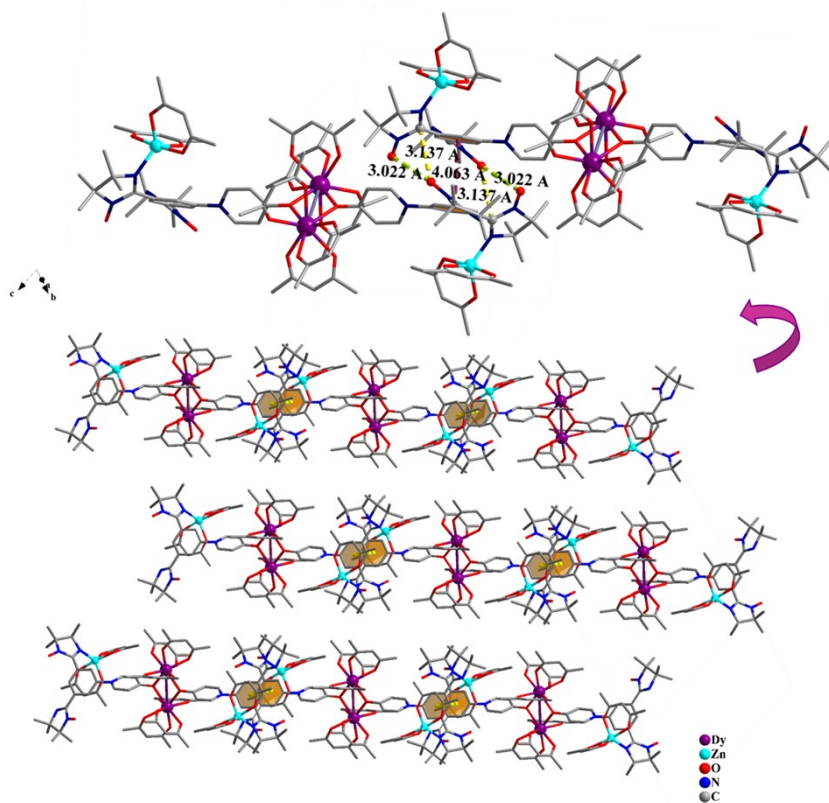

Fig.S3. Packing diagram of complex 2. H and F atoms are not shown for clarity.

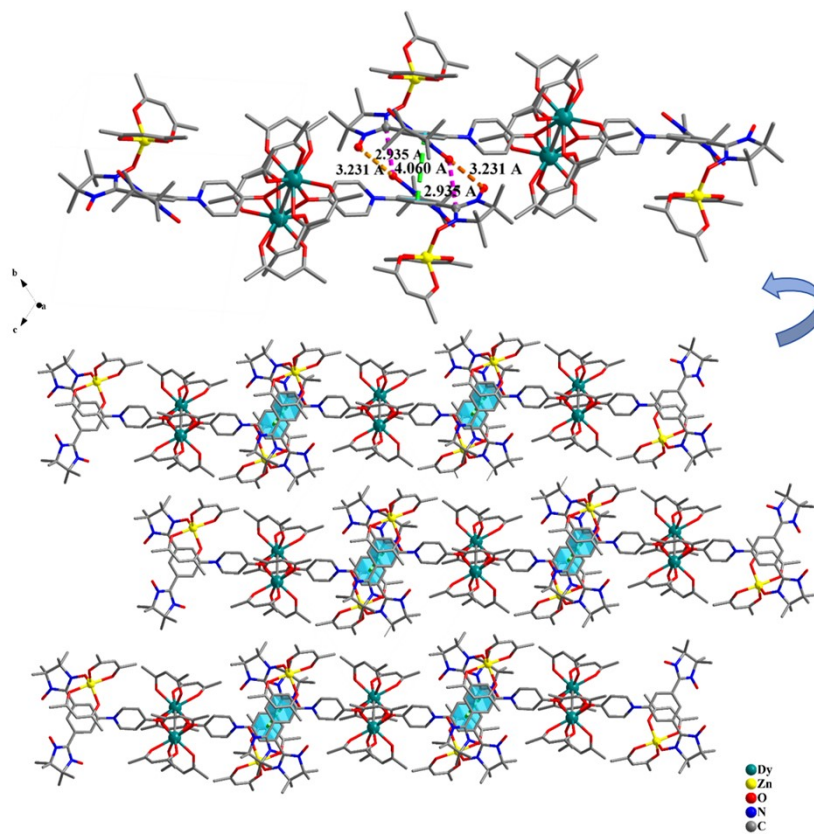

Fig.S4. Packing diagram of complex 3. H and F atoms are not shown for clarity.

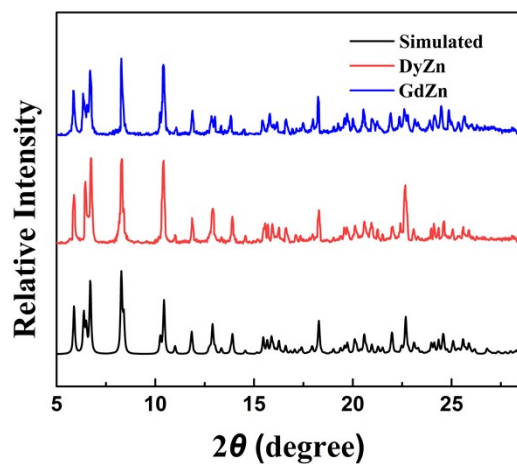

**Fig.S5.** The Powder X-ray diffraction (PXRD) patterns for complexes **1** and **2** at room temperature.

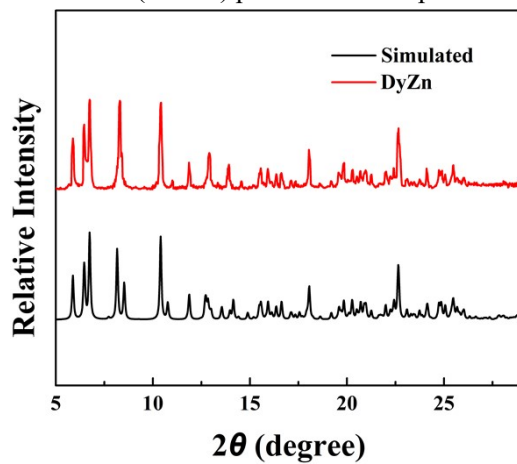

**Fig.S6.** The Powder X-ray diffraction (PXRD) pattern for complex **3** at room temperature.

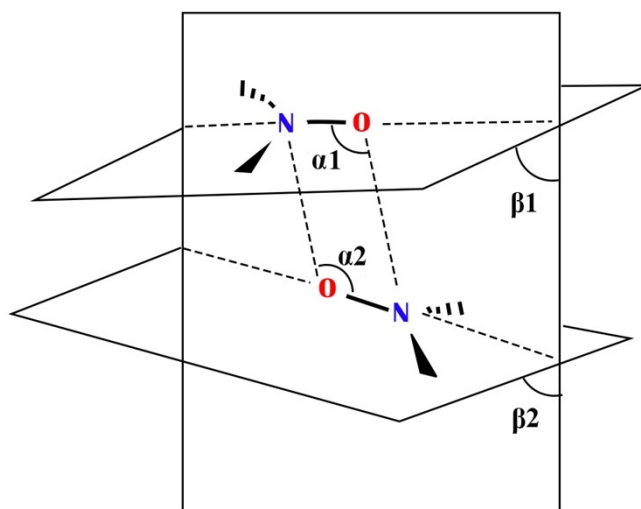

**Fig.S7.** Definition of the parameters used in the discussion of two nitroxide groups interactions.

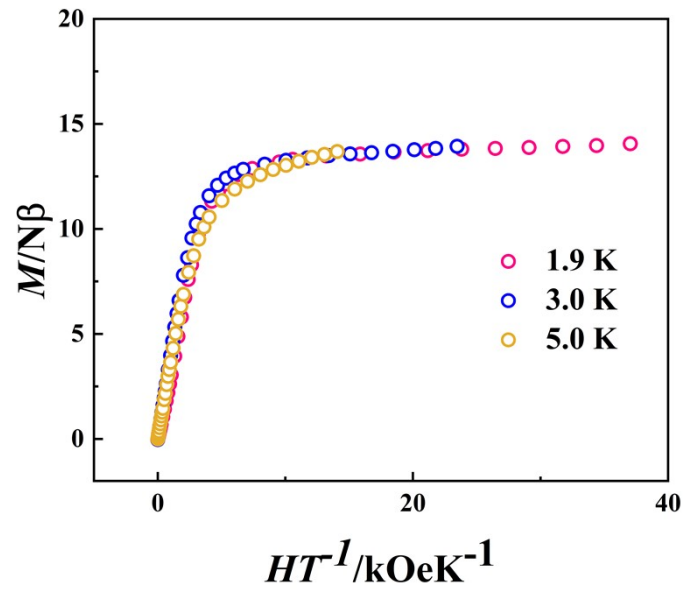

**Fig.S8.** Plots of  $M$  vs.  $H/T$  between 0 and 70 kOe at temperatures 1.9, 3.0 and 5.0 K for **2**

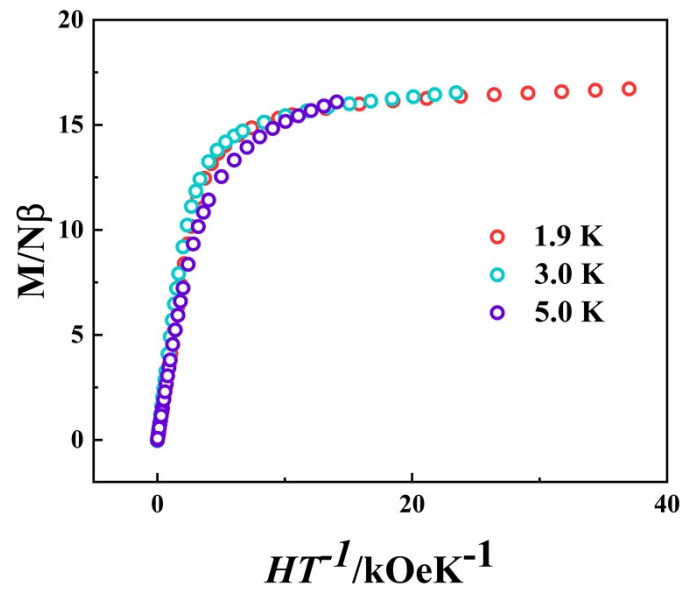

**Fig.S9.** Plots of  $M$  vs.  $H/T$  between 0 and 70 kOe at temperatures 1.9, 3.0 and 5.0 K for **3**

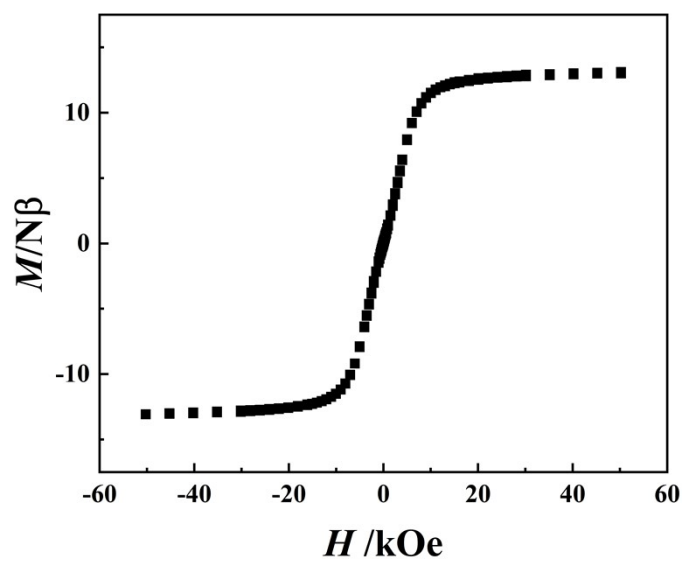

Fig.S10. Magnetization plot of complex 2 at 1.9 K.

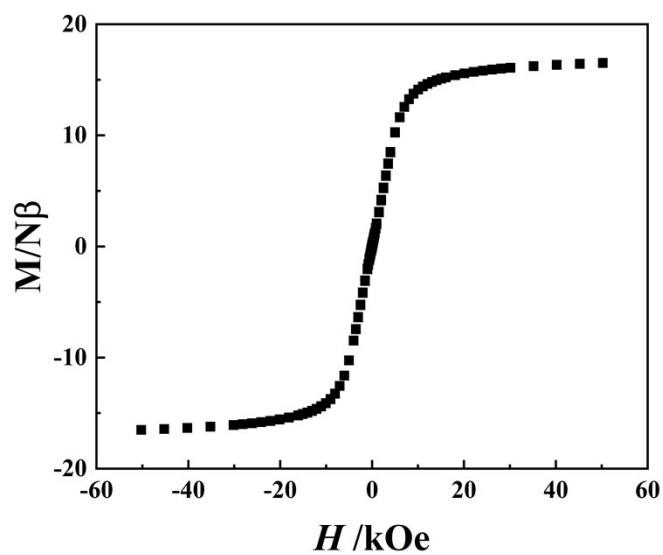

Fig.S11. Magnetization plot of complex 3 at 1.9 K.

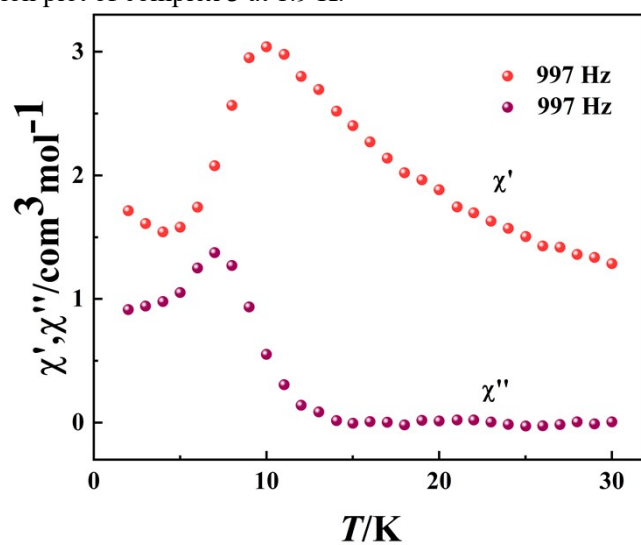

Fig.S12. Temperature dependences of the in-phase and out-of-phase ac susceptibilities under



00e dc field for 2.

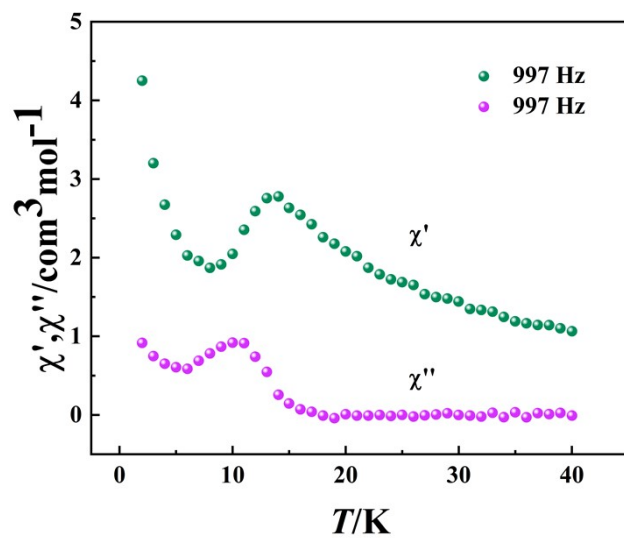

Fig.S13. Temperature dependences of the in-phase and out-of-phase ac susceptibilities under 00e dc field for 3.
